# Supplementary material for: Community Engagement and Psychometric Methods in Aboriginal and Torres Strait Islander Patient-Reported Outcome Measures and Surveys—A Scoping Review and Critical Analysis
Source: MDPI journal article supplement (doi:10.3390/ijerph191610354), 2022-08-19
Supplement: s1 [file s1]

**Table S2.** Scoping Review Psychometric Properties

| Process     | Property             | Definition                                                                                                                                                         |
|-------------|----------------------|--------------------------------------------------------------------------------------------------------------------------------------------------------------------|
| Validity    | Face                 | The relevance and readability of the instrument for the target population [15].                                                                                    |
|             | Content              | The ability of the instrument in capturing latent variables/main constructs [52].                                                                                  |
|             | Construct            | The extent to which the measurement accomplishes the purpose of which it is intended. The relationship between the latent variable and construct of interest [52]. |
| Reliability | Internal consistency | The relatedness of items in instruments to each other in measuring main constructs.                                                                                |
|             | Repeatability        | The ability of instrument scores to be reproduced by same users over a set period where conditions have not changed, though test re-test process.                  |
