# Supplementary figures and images for: Community Engagement and Psychometric Methods in Aboriginal and Torres Strait Islander Patient-Reported Outcome Measures and Surveys—A Scoping Review and Critical Analysis
Source: MDPI journal article supplement (doi:10.3390/ijerph191610354), 2022-08-19

**Figure S1.** PRISMA flow diagram.

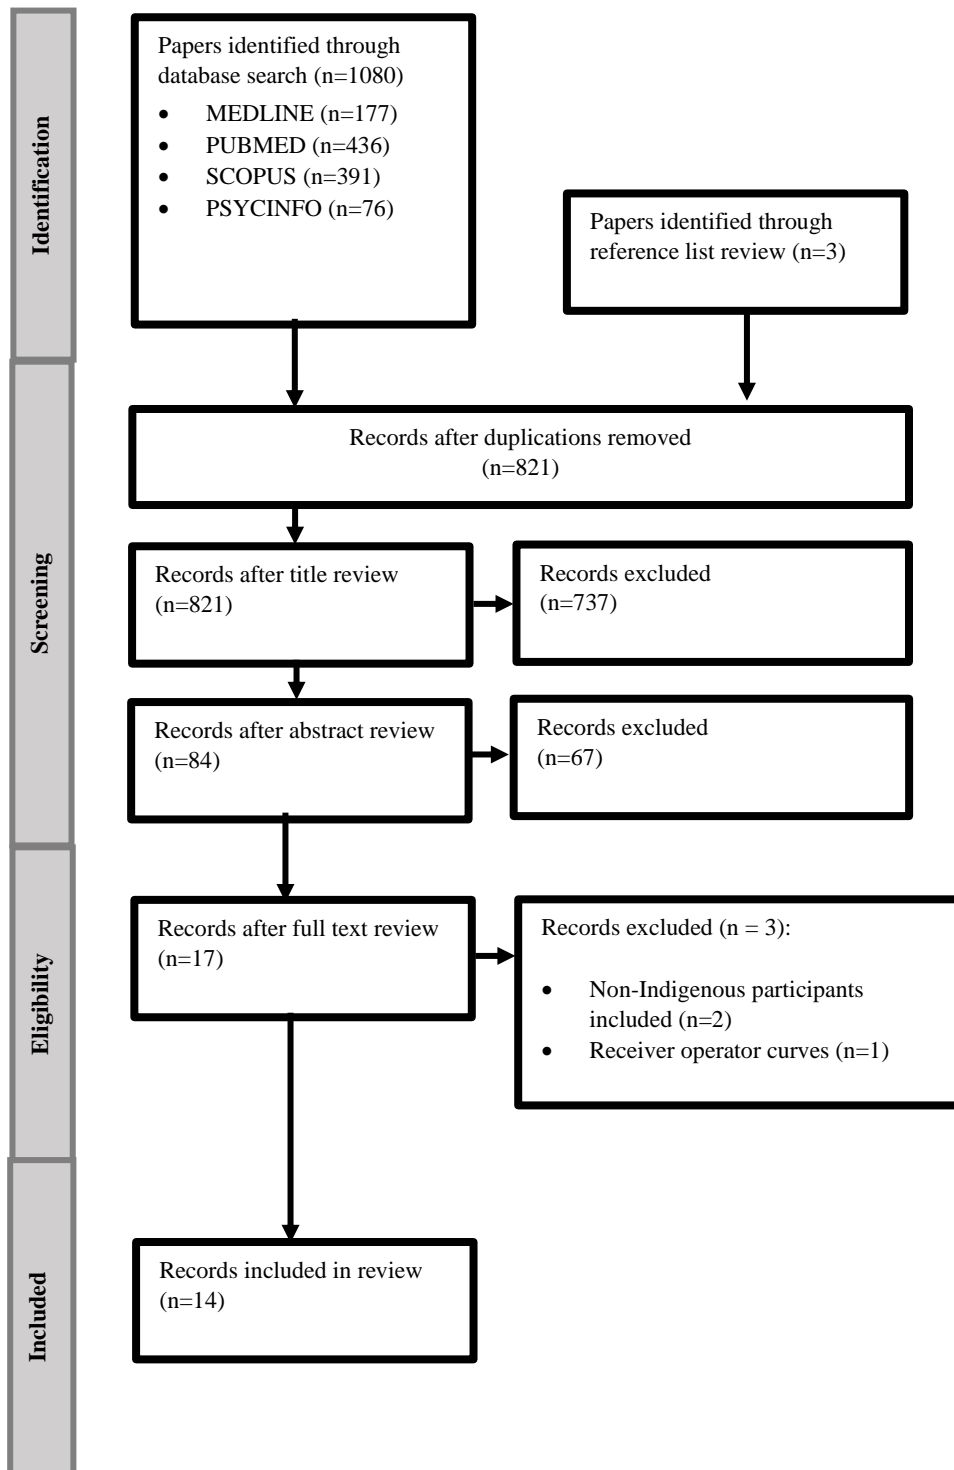

Supplement: s1 [file s1]
